# Supplementary material
Source: bioRxiv or medRxiv preprint supplement (https://medrxiv.org/highwire/filestream/73257/field_highwire_adjunct_files/0/2020.03.06.19014944-1.pdf)
Supplement: Supplementary file [file 2020.03.06.19014944-1.pdf]

| Key |                  |
|-----|------------------|
|     | Positive (Final) |
|     | Positive (Draft) |
|     | Negative (Final) |
|     | Negative (Draft) |
|     | Terminated       |

| Drug name      | Disease               | Indication                      | TA number                                                                                                                                                                                                                | NOTES                 |                                            |
|----------------|-----------------------|---------------------------------|--------------------------------------------------------------------------------------------------------------------------------------------------------------------------------------------------------------------------|-----------------------|--------------------------------------------|
| <b>GROUP 1</b> |                       |                                 |                                                                                                                                                                                                                          |                       |                                            |
| 1              | Bosutinib             | Chronic myeloid leukaemia (CML) | Previously treated chronic, accelerated and blast phase Philadelphia-chromosome-positive CML when imatinib, nilotinib and dasatinib are not appropriate                                                                  | <a href="#">TA401</a> | Published August 2016                      |
| 2              | Cetuximab             | Head and neck cancer            | Recurrent or metastatic squamous cell carcinoma of the head and neck that started in the oral cavity                                                                                                                     | <a href="#">TA473</a> | Published August 2017                      |
| 3              | Crizotinib            | Non-small-cell lung cancer      | Previously treated anaplastic lymphoma kinase (ALK)-positive advanced non-small-cell lung cancer                                                                                                                         | <a href="#">TA422</a> | Published December 2016                    |
| 4              | Dasatinib             | Chronic myeloid leukaemia (CML) | Chronic or accelerated phase Philadelphia-chromosome-positive CML that is imatinib resistant or when imatinib cannot be tolerated                                                                                        | <a href="#">TA425</a> | Published December 2016                    |
| 5              | Dasatinib             | Chronic myeloid leukaemia (CML) | Untreated chronic phase Philadelphia-chromosome-positive CML                                                                                                                                                             | <a href="#">TA426</a> | Published December 2016                    |
| 6              | Everolimus            | Renal cell carcinoma            | Previously treated advanced renal cell carcinoma                                                                                                                                                                         | <a href="#">TA432</a> | Published February 2017                    |
| 7              | Everolimus            | Breast cancer                   | Advanced human epidermal growth factor receptor 2 (HER2)-negative, hormone-receptor-positive breast cancer in postmenopausal women without symptomatic visceral disease who have had a non-steroidal aromatase inhibitor | <a href="#">TA421</a> | Published December 2016                    |
| 8              | Pemetrexed            | Non-small-cell lung cancer      | Maintenance treatment of locally advanced or metastatic non-squamous non-small-cell lung cancer                                                                                                                          | <a href="#">TA402</a> | Published August 2016                      |
| 9              | Radium-223 dichloride | Prostate cancer                 | Hormone-relapsed prostate cancer with bone metastases                                                                                                                                                                    | <a href="#">TA412</a> | Published September 2016                   |
| 10             | Sorafenib             | Hepatocellular carcinoma        | Advanced hepatocellular carcinoma in people with Child-Pugh grade A liver impairment                                                                                                                                     | <a href="#">TA474</a> | Published September 2017                   |
| 11             | Trastuzumab emtansine | Breast cancer                   | Human epidermal growth factor receptor 2 (HER2)-positive, unresectable, locally advanced or metastatic breast cancer in adults who have had trastuzumab and a taxane                                                     | <a href="#">TA458</a> | Published November 2017                    |
| <b>GROUP 2</b> |                       |                                 |                                                                                                                                                                                                                          |                       |                                            |
| 12             | Abiraterone           | Prostate cancer                 | Metastatic hormone-relapsed prostate cancer before chemotherapy is indicated                                                                                                                                             | <a href="#">TA387</a> | Published April 2016                       |
| 13             | Brentuximab vedotin   | Hodgkin lymphoma                | Relapsed or refractory CD30-positive Hodgkin lymphoma                                                                                                                                                                    | <a href="#">TA446</a> | Published June 2017                        |
| 14             | Cabazitaxel           | Prostate cancer                 | Hormone-relapsed metastatic prostate cancer treated with docetaxel                                                                                                                                                       | <a href="#">TA391</a> | Published May 2016                         |
| 15             | Cetuximab             | Colorectal cancer               | Untreated epidermal growth factor receptor (EGFR)-expressing, RAS wild-type metastatic colorectal cancer in combination with irinotecan                                                                                  | <a href="#">TA439</a> | Published March 2017                       |
| 16             | Cetuximab             | Colorectal cancer               | Untreated EGFR-expressing, RAS wild-type metastatic colorectal cancer in combination with oxaliplatin                                                                                                                    |                       |                                            |
| 17             | Panitumumab           | Colorectal cancer               | Untreated RAS wild-type metastatic colorectal cancer in combination with irinotecan                                                                                                                                      |                       |                                            |
| 18             | Panitumumab           | Colorectal cancer               | Untreated RAS wild-type metastatic colorectal cancer in combination with oxaliplatin                                                                                                                                     |                       |                                            |
| 19             | Enzalutamide          | Prostate cancer                 | Metastatic hormone-relapsed prostate cancer before chemotherapy is indicated                                                                                                                                             | <a href="#">TA377</a> | Published January 2016                     |
| 20             | Eribulin              | Breast cancer                   | Locally advanced or metastatic breast cancer after 2 or more chemotherapy regimens                                                                                                                                       | <a href="#">TA423</a> | Published December 2016                    |
| 21             | Ibrutinib             | Chronic lymphocytic leukaemia   | Previously treated chronic lymphocytic leukaemia and untreated chronic lymphocytic leukaemia with a 17p deletion or TP53 mutation                                                                                        | <a href="#">TA429</a> | Published January 2017                     |
| 22             | Pertuzumab            | Breast cancer                   | HER2-positive metastatic or locally recurrent unresectable breast cancer                                                                                                                                                 | <a href="#">TA509</a> | Published March 2018                       |
| <b>GROUP 3</b> |                       |                                 |                                                                                                                                                                                                                          |                       |                                            |
| 23             | Bortezomib            | Multiple myeloma                | Relapsed multiple myeloma                                                                                                                                                                                                | <a href="#">TA453</a> | Terminated appraisal - published July 2017 |
| 24             | Brentuximab vedotin   | Lymphoma                        | Relapsed or refractory systemic anaplastic large cell lymphoma                                                                                                                                                           | <a href="#">TA478</a> | Published October 2017                     |

|    |              |                                 |                                                                                                                                                               |                        |                                                                  |
|----|--------------|---------------------------------|---------------------------------------------------------------------------------------------------------------------------------------------------------------|------------------------|------------------------------------------------------------------|
| 25 | Cabozantinib | Thyroid cancer                  | Progressive, unresectable, locally advanced or metastatic medullary thyroid cancer                                                                            | <a href="#">TA516</a>  | Published March 2018                                             |
| 26 | Ibrutinib    | non-Hodgkin lymphoma            | Waldenstrom's macroglobulinaemia                                                                                                                              | <a href="#">TA491</a>  | Published November 2017                                          |
| 27 | Ponatinib    | Chronic myeloid leukaemia (CML) | Chronic, accelerated or blast phase CML                                                                                                                       | <a href="#">TA451</a>  | Published June 2017                                              |
| 28 | Ponatinib    | Acute lymphoblastic leukaemia   | Philadelphia-chromosome-positive acute lymphoblastic leukaemia                                                                                                |                        |                                                                  |
| 29 | Regorafenib  | Gastrointestinal cancer         | Previously treated unresectable or metastatic gastrointestinal stromal tumours                                                                                | <a href="#">TA488</a>  | Published November 2017                                          |
| 30 | Sorafenib    | Differentiated thyroid cancer   | Progressive, locally advanced or metastatic differentiated thyroid cancer (papillary, follicular or Hürthle cell) that does not respond to radioactive iodine | <a href="#">ID1059</a> | Positive draft recommendation - publication expected August 2018 |
| 31 | Sunitinib    | Neuroendocrine tumours          | Well- or moderately differentiated unresectable or metastatic neuroendocrine tumours of pancreatic origin in adults with progressive disease                  | <a href="#">TA449</a>  | Published June 2017                                              |
| 32 | Vandetanib   | Medullary thyroid cancer        | Unresectable, locally advanced or metastatic medullary thyroid cancer                                                                                         | <a href="#">ID1415</a> | Negative draft recommendation - publication expected TBC         |
| 33 | Vismodegib   | Basal cell carcinoma            | Metastatic basal cell carcinoma, or locally advanced disease that is inappropriate for surgery or radiotherapy                                                | <a href="#">TA400</a>  | Published November 2017                                          |

| NOT APPRAISING                  |                                    |                                                                                                                                                                 |        |
|---------------------------------|------------------------------------|-----------------------------------------------------------------------------------------------------------------------------------------------------------------|--------|
| Bendamustine                    | Lymphoma                           | First line                                                                                                                                                      | N/A    |
| Bendamustine                    | Lymphoma                           | Second line                                                                                                                                                     | N/A    |
| Bendamustine                    | Non-Hodgkin lymphoma               | First line                                                                                                                                                      | N/A    |
| Bendamustine                    | Non-Hodgkin lymphoma               | Second line                                                                                                                                                     | N/A    |
| Bevacizumab                     | Cervical cancer                    | First line                                                                                                                                                      | N/A    |
| Bevacizumab                     | Glioma                             | Third line                                                                                                                                                      | N/A    |
| Bevacizumab                     | Ovarian cancer                     | First line                                                                                                                                                      | N/A    |
| Clofarabine                     | Leukaemia (acute myeloblastic)     | Second line                                                                                                                                                     |        |
| Clofarabine                     | Acute lymphoblastic leukemia       | Acute lymphoblastic leukaemia in patients with relapsed or refractory disease in whom the intent is to use treatment as a bridge to bone marrow transplantation | ID1033 |
| Lenalidomide                    | Myelodysplastic syndromes          | First line                                                                                                                                                      | N/A    |
| Pegylated liposomal doxorubicin | Sarcoma                            | Any                                                                                                                                                             | N/A    |
| Nelarabine                      | Lymphoblastic non-Hodgkin lymphoma | Refractory T-cell lymphoblastic non-Hodgkin's lymphoma                                                                                                          | ID1044 |
| Nelarabine                      | Acute lymphoblastic leukaemia      | T-cell acute lymphoblastic leukaemia as a bridge to bone marrow transplantation                                                                                 | ID1034 |
| Temsirolimus                    | Renal cell carcinoma               | First-line treatment of advanced renal cell carcinoma in people who have at least 3 of 6 prognostic risk factors                                                | TA178  |
